# Supplementary material for: Brown adipose tissue estimated with the magnetic resonance imaging fat fraction is associated with glucose metabolism in adolescents
Source: PubMed Central journal article supplement — Pediatr Obes. 2019 Jul 9;14(9):e12531. doi: 10.1111/ijpo.12531 (PMC6771901; doi:10.1111/ijpo.12531), 2019-07-09
Supplement: IJPO-14-na-s001.pdf [file IJPO-14-na-s001.pdf]

## **Supplementary Information**

### **Brown adipose tissue estimated by the magnetic resonance imaging fat fraction is associated with glucose metabolism in adolescents**

Elin Lundström<sup>1,\*,\*</sup>, Joy Ljungberg<sup>1,‡</sup>, Jonathan Andersson<sup>1</sup>, Hannes Manell<sup>2,3,4</sup>, Robin Strand<sup>1,5</sup>, Anders Forslund<sup>2,3</sup>, Peter Bergsten<sup>2,3,4</sup>, Daniel Weghuber<sup>6,7</sup>, Katharina Mörwald<sup>6,7</sup>, Fanni Zsoldos<sup>6,7</sup>, Kurt Widhalm<sup>6,7,8</sup>, Matthias Meissnitzer<sup>9</sup>, Håkan Ahlström<sup>1,10</sup>, Joel Kullberg<sup>1,10</sup>

<sup>1</sup> Department of Surgical Sciences, Section of Radiology, Uppsala University, Uppsala, Sweden

<sup>2</sup> Department of Women's and Children's Health, Uppsala University, Uppsala, Sweden.

<sup>3</sup> Children Obesity Clinic, Uppsala University Hospital, Uppsala, Sweden

<sup>4</sup> Department of Medical Cell Biology, Uppsala University, Uppsala, Sweden

<sup>5</sup> Department of Information Technology, Uppsala University, Uppsala, Sweden

<sup>6</sup> Department of Paediatrics, Paracelsus Medical University, Salzburg, Austria

<sup>7</sup> Obesity Research Unit, Paracelsus Medical University, Salzburg, Austria

<sup>8</sup> Department of Pediatrics, Medical University of Vienna, Vienna, Austria

<sup>9</sup> Department of Radiology, Paracelsus Medical University, Salzburg, Austria

<sup>10</sup> Antaros Medical, BioVenture Hub, Mölndal, Sweden

\* These authors contributed equally to this work.

\* Corresponding author

E-mail: elin.lundstrom@radiol.uu.se (EL)

Address: MRT, Entrance 24, Uppsala University Hospital, SE-751 85 Uppsala, Sweden

### **Handling and Analyses of Blood Samples**

In Uppsala, the blood glucose concentration was analyzed with an Architect c8000 instrument (Abbott Diagnostics, Solna, Sweden) and in Salzburg, with a Gluco-quant Glucose-Kit (Roche Diagnostics, Mannheim, Germany). Selected samples were used for cross-validation between Uppsala and Salzburg. From both sites, frozen blood samples were sent to a central laboratory for analysis of the blood insulin concentration, performed with single-plex enzyme-linked immunosorbent assay kits (Merckodia AB, Uppsala, Sweden). Interplate variability was controlled using standardized control samples (Merckodia AB).

## **Biochemical Parameters and Growth Spurt for Assessment of Pubertal Status**

The biochemical thresholds indicated onset of puberty and an ended growth spurt indicated the end of puberty. The biochemical thresholds for puberty were as follows: for boys luteinizing hormone (LH) > 0.6 [IU/l] and testosterone > 2 [nmol/l]; for girls LH > 0.3 [IU/l], follicular stimulating hormone > 2 [IU/l] and estradiol > 100 [pmol/l](1,2).

## **Statistics**

In conjunction with group comparisons, the data for each group were tested for normality and differences in variance using Levene's test, probability plots, and histogram analyses. Prior to linear regression, scatter plots of each pair of dependent variable (sBAT FF or T<sub>2</sub><sup>\*</sup>) and explanatory variable (sex, age, adiposity or glucose metabolism parameters) were visually assessed for homoscedasticity and linear relationship. The probability plots and residual predicted plots were used to visually assess the goodness of fit of the model. To avoid possible multicollinearity between explanatory variables, correlation between the different measurements of adiposity was evaluated. The variance inflation factor (VIF) was always below 3.4.

## **References**

1. McCartney CR, Blank SK, Prendergast KA, *et al.* Obesity and sex steroid changes across puberty: evidence for marked hyperandrogenemia in pre- and early pubertal obese girls. *J Clin Endocrinol Metab* 2007; 92: 430-436.
2. Vandewalle S, Taes Y, Fiers T, *et al.* Sex steroids in relation to sexual and skeletal maturation in obese male adolescents. *J Clin Endocrinol Metab* 2014; 99: 2977-2985.
